# Supplementary material
Source: PubMed Central journal article supplement (PMC11029133)
Supplement: 262_2016_1816_MOESM1_ESM.pdf [file 262_2016_1816_MOESM1_ESM.pdf]

**Supplemental Table 1** Combination of MVA-BN-HER2 and anti-CTLA-4 immunotherapies led to synergy in a mouse lung metastasis model

| MVA-BN-HER2 (Inf. U) | anti-CTLA-4 (mg/kg) | mOS (Days) | Combination Index (CI) | Description           |
|----------------------|---------------------|------------|------------------------|-----------------------|
| 0                    | 0                   | 29         | N/A                    | N/A                   |
| 1E5                  | 0                   | 30         | N/A                    | N/A                   |
| 1E6                  | 0                   | 32         | N/A                    | N/A                   |
| 1E7                  | 0                   | 46         | N/A                    | N/A                   |
| 0                    | 1                   | 31         | N/A                    | N/A                   |
| 0                    | 3                   | 30         | N/A                    | N/A                   |
| 0                    | 10                  | 33         | N/A                    | N/A                   |
| 1E7                  | 1                   | 51         | 0.149                  | Strong Synergism      |
| 1E7                  | 3                   | 60         | 0.013                  | Very Strong Synergism |
| 1E7                  | 10                  | 84         | <0.001                 | Very Strong Synergism |

Mice were implanted i.v. with CT26-HER-2 cells on day 1 and treated with MVA-BN-HER2 (t.s., days 4 & 18) or anti-CTLA-4 (i.p., Clone 9D9 on days 3 & 17 or 4 & 18) at doses indicated in the table. Note that survival studies reported in the main body of the paper were treated with anti-CTLA-4 on days 3 & 17 only, therefore the mOS values reported in the paper and Supplemental Table 1 are similar but not identical.

**Description and Interpretation of CI from Chou TC:**

| CI        | Description            |
|-----------|------------------------|
| <0.1      | Very Strong Synergism  |
| 0.1 – 0.3 | Strong Synergism       |
| 0.3 – 0.7 | Synergism              |
| 0.7 – 0.9 | Moderate Synergism     |
| 0.9-1.10  | Nearly Additive        |
| 1.10-1.45 | Moderate Antagonism    |
| 1.45-3.3  | Antagonism             |
| 2.2 – 10  | Strong Antagonism      |
| >10       | Very Strong Antagonism |

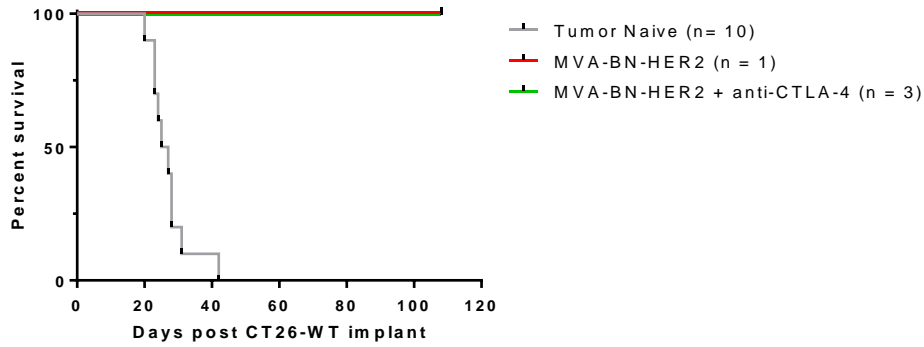

**Supplemental Figure 1** Durable immune response with antigen spread after tumor rejection. Six months after the primary CT26-HER-2 challenge, mice that rejected tumors were implanted with CT26-WT cells. In the same experiment, CT26-WT cells were implanted into control (tumor naïve) mice that were not previously challenged with CT26-HER-2 cells.

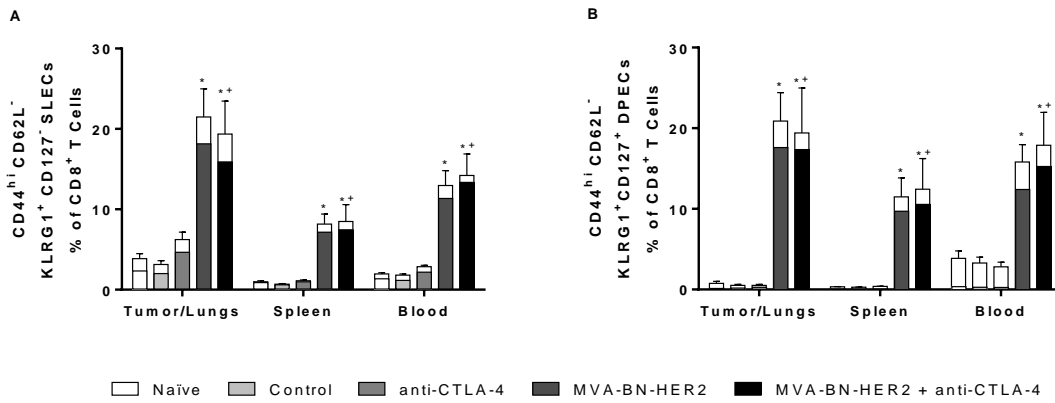

**Supplemental Figure 2** MVA-BN-HER2 alone or in combination with CTLA-4 blockade increased the effector cell population. Cells were defined by their expression of CD127 and KLRG1 (empty bars) and the effector memory markers CD44<sup>hi</sup> and CD62L<sup>-</sup> (shaded bars). A) CD8<sup>+</sup> CD127<sup>+</sup> KLRG1<sup>+</sup> short lived effector cells (SLECs) and B) CD8<sup>+</sup> CD127<sup>+</sup> KLRG1<sup>+</sup> double positive effector cells (DPECs).  $p < 0.05$ : \* vs. control, † vs. anti-CTLA-4, and # vs. MVA-BN-HER2.
